# Supplementary material
Source: publisher figshare collection journal article supplement (https://acs.figshare.com/ndownloader/files/5700984)
Supplement: Supplementary file 1 [file 5700984]

 
data_a 
 
_audit_creation_method            SHELXL-97 
_chemical_name_systematic 
; 
 ? 
; 
_chemical_name_common             ? 
_chemical_melting_point           ? 
_chemical_formula_moiety          ? 
_chemical_formula_sum 
 'C3 H6 Cu N O5' 
_chemical_formula_weight          199.63 
 
loop_ 
 _atom_type_symbol 
 _atom_type_description 
 _atom_type_scat_dispersion_real 
 _atom_type_scat_dispersion_imag 
 _atom_type_scat_source 
 'C'  'C'   0.0033   0.0016 
 'International Tables Vol C Tables 4.2.6.8 and 6.1.1.4' 
 'H'  'H'   0.0000   0.0000 
 'International Tables Vol C Tables 4.2.6.8 and 6.1.1.4' 
 'N'  'N'   0.0061   0.0033 
 'International Tables Vol C Tables 4.2.6.8 and 6.1.1.4' 
 'O'  'O'   0.0106   0.0060 
 'International Tables Vol C Tables 4.2.6.8 and 6.1.1.4' 
 'Cu'  'Cu'   0.3201   1.2651 
 'International Tables Vol C Tables 4.2.6.8 and 6.1.1.4' 
 
_symmetry_cell_setting            'Tetragonal' 
_symmetry_space_group_name_H-M    P-42(1)c 
 
loop_ 
 _symmetry_equiv_pos_as_xyz 
 'x, y, z' 
 '-x, -y, z' 
 'y, -x, -z' 
 '-y, x, -z' 
 '-x+1/2, y+1/2, -z+1/2' 
 'x+1/2, -y+1/2, -z+1/2' 
 '-y+1/2, -x+1/2, z+1/2' 
 'y+1/2, x+1/2, z+1/2' 
 
_cell_length_a                    12.5982(18) 
_cell_length_b                    12.5982(18) 
_cell_length_c                    9.1950(18) 
_cell_angle_alpha                 90.00 
_cell_angle_beta                  90.00 
_cell_angle_gamma                 90.00 
_cell_volume                      1459.4(4) 
_cell_formula_units_Z             8 
_cell_measurement_temperature     293(2) 
_cell_measurement_reflns_used     13296 
_cell_measurement_theta_min       2.29 
_cell_measurement_theta_max       27.48 
 
_exptl_crystal_description        'Block' 
_exptl_crystal_colour             'Blue' 
_exptl_crystal_size_max           0.4  
_exptl_crystal_size_mid           0.3 
_exptl_crystal_size_min           0.2 
_exptl_crystal_density_meas       ? 
_exptl_crystal_density_diffrn     1.817 
_exptl_crystal_density_method     'not measured' 
_exptl_crystal_F_000              800 
_exptl_absorpt_coefficient_mu     2.960 
_exptl_absorpt_correction_type    'Empirical 
_exptl_absorpt_correction_T_min   0.283 
_exptl_absorpt_correction_T_max   0.553 
 
_exptl_special_details 
; 
ABSCOR by T.Higashi    8 March, 1995
; 
 
_diffrn_ambient_temperature       293(2) 
_diffrn_radiation_wavelength      0.71073 
_diffrn_radiation_type            MoK\a 
_diffrn_radiation_source          'fine-focus sealed tube' 
_diffrn_radiation_monochromator   graphite 
_diffrn_measurement_device_type   'Rigaku RAXIS RAPID IP' 
_diffrn_measurement_method        'Oscillation' 
_diffrn_detector_area_resol_mean  '100x100 microns' 
_diffrn_standards_number          ? 
_diffrn_standards_interval_count  ? 
_diffrn_standards_interval_time   ? 
_diffrn_standards_decay_%         ? 
_diffrn_reflns_number             13296 
_diffrn_reflns_av_R_equivalents   0.0738 
_diffrn_reflns_av_sigmaI/netI     0.0887 
_diffrn_reflns_limit_h_min        -16 
_diffrn_reflns_limit_h_max        16 
_diffrn_reflns_limit_k_min        -16 
_diffrn_reflns_limit_k_max        16 
_diffrn_reflns_limit_l_min        -11 
_diffrn_reflns_limit_l_max        11 
_diffrn_reflns_theta_min          2.29 
_diffrn_reflns_theta_max          27.48 
_reflns_number_total              963 
_reflns_number_gt                 738 
_reflns_threshold_expression      >2sigma(I) 
 
_computing_data_collection        'Molecular Structure Corporation (1994)
                                   MSC/AFC Diffractometer Control Software
                                   MSC, 3200 Research Forest Drive, The
                                   Woodlands, TX 77381, USA.'
_computing_cell_refinement        'Molecular Structure Corporation (1994)
                                   MSC/AFC Diffractometer Control Software
                                   MSC, 3200 Research Forest Drive, The
                                   Woodlands, TX 77381 USA.'
_computing_data_reduction         'Sheldrick, G. M. (1997) SHELXS97, Program
                                   for the Solution of Crystal Structure,
                                   University of Gottingen, Germany.'
_computing_structure_solution     'Sheldrick, G. M. (1997) SHELXS97, Program
                                   for the Solution of Crystal Structure,
                                   University of Gottingen, Germany.'
_computing_structure_refinement   'Sheldrick, G. M. (1997) SHELXL97, Program
                                   for the Refinement of Crystal Structure,
                                   University of Gottingen, Germany.'
_computing_molecular_graphics     'Interactive Molecular Graphics XP, Virsion
                                   4.2 for MSDOS (1990), Siemens Analytical
                                   X-ray Instruments Inc., Madison, Wisconsin,
                                   USA.'
_computing_publication_material   'Sheldrick, G. M. (1997) SHELXL97, Program
                                   for the refinement of Crystal Structure,
                                   University of Gottingen, Germany.'
 
_refine_special_details 
; 
 Refinement of F^2^ against ALL reflections.  The weighted R-factor wR and 
 goodness of fit S are based on F^2^, conventional R-factors R are based 
 on F, with F set to zero for negative F^2^. The threshold expression of 
 F^2^ > 2sigma(F^2^) is used only for calculating R-factors(gt) etc. and is 
 not relevant to the choice of reflections for refinement.  R-factors based 
 on F^2^ are statistically about twice as large as those based on F, and R- 
 factors based on ALL data will be even larger. 
; 
 
_refine_ls_structure_factor_coef  Fsqd  
_refine_ls_matrix_type            full 
_refine_ls_weighting_scheme       calc  
_refine_ls_weighting_details 
 'calc w=1/[\s^2^(Fo^2^)+(0.0091P)^2^+0.0000P] where P=(Fo^2^+2Fc^2^)/3' 
_atom_sites_solution_primary      direct 
_atom_sites_solution_secondary    difmap 
_atom_sites_solution_hydrogens    'hydrogen atoms are generated by HFIX
                                  instructions' or 'difmap'
_refine_ls_hydrogen_treatment     'hydrogen coordinates ride on the coordinates
                                  of the previous atom, the isotropic U values
                                  are 1.2 OR 1.5 time over the U values of the
                                  previous atom.'
_refine_ls_extinction_method      SHELXL 
_refine_ls_extinction_coef        0.0123(8) 
_refine_ls_extinction_expression 
 'Fc^*^=kFc[1+0.001xFc^2^\l^3^/sin(2\q)]^-1/4^' 
_refine_ls_abs_structure_details 
 'Flack H D (1983), Acta Cryst. A39, 876-881' 
_refine_ls_abs_structure_Flack    0.21(4) 
_refine_ls_number_reflns          963 
_refine_ls_number_parameters      116 
_refine_ls_number_restraints      1 
_refine_ls_R_factor_all           0.0515 
_refine_ls_R_factor_gt            0.0343 
_refine_ls_wR_factor_ref          0.0599 
_refine_ls_wR_factor_gt           0.0573 
_refine_ls_goodness_of_fit_ref    0.887 
_refine_ls_restrained_S_all       0.887 
_refine_ls_shift/su_max           0.000 
_refine_ls_shift/su_mean          0.000 
 
loop_ 
 _atom_site_label 
 _atom_site_type_symbol 
 _atom_site_fract_x 
 _atom_site_fract_y 
 _atom_site_fract_z 
 _atom_site_U_iso_or_equiv 
 _atom_site_adp_type 
 _atom_site_occupancy 
 _atom_site_symmetry_multiplicity 
 _atom_site_calc_flag 
 _atom_site_refinement_flags 
 _atom_site_disorder_assembly 
 _atom_site_disorder_group 
Cu Cu 0.10497(4) 0.75062(5) 0.02737(7) 0.0218(2) Uani 1 1 d . . . 
O1 O 0.1555(3) 0.8986(3) 0.0375(4) 0.0271(8) Uani 1 1 d . . . 
O2 O 0.2120(3) 1.0378(3) 0.1580(4) 0.0244(9) Uani 1 1 d . . . 
O3 O 0.1982(3) 0.7653(3) 0.4468(4) 0.0300(9) Uani 1 1 d . . . 
O4 O 0.1519(3) 0.7218(3) 0.2240(4) 0.0277(10) Uani 1 1 d . . . 
O5 O 0.4025(4) 0.7220(6) 0.1895(7) 0.065(2) Uani 1 1 d D . . 
N N 0.0421(3) 0.6025(4) 0.0240(5) 0.0278(10) Uani 1 1 d . . . 
C1 C 0.1680(4) 0.9487(4) 0.1557(6) 0.0195(12) Uani 1 1 d . . . 
C2 C 0.1299(5) 0.9030(4) 0.2962(6) 0.0291(13) Uani 1 1 d . . . 
H2A H 0.0530 0.9067 0.2982 0.035 Uiso 1 1 calc R . . 
H2B H 0.1563 0.9467 0.3752 0.035 Uiso 1 1 calc R . . 
C3 C 0.1633(4) 0.7894(4) 0.3230(6) 0.0244(13) Uani 1 1 d . . . 
C4 C -0.0533(6) 0.5801(5) 0.019(2) 0.159(7) Uani 1 1 d . . . 
H4 H -0.1011 0.6355 0.0052 0.191 Uiso 1 1 calc R . . 
C5 C 0.0947(6) 0.5216(5) 0.0334(18) 0.162(8) Uani 1 1 d . . . 
H5 H 0.1670 0.5284 0.0512 0.194 Uiso 1 1 calc R . . 
HO5A H 0.361(7) 0.692(7) 0.241(10) 0.080 Uiso 1 1 d . . . 
HO5B H 0.370(6) 0.746(8) 0.158(10) 0.080 Uiso 1 1 d D . . 
 
loop_ 
 _atom_site_aniso_label 
 _atom_site_aniso_U_11 
 _atom_site_aniso_U_22 
 _atom_site_aniso_U_33 
 _atom_site_aniso_U_23 
 _atom_site_aniso_U_13 
 _atom_site_aniso_U_12 
Cu 0.0213(3) 0.0201(3) 0.0239(3) -0.0003(4) -0.0019(3) -0.0021(3) 
O1 0.035(2) 0.022(2) 0.0239(18) 0.005(2) -0.0008(19) -0.0054(17) 
O2 0.032(2) 0.0179(19) 0.0237(19) 0.0056(18) -0.0057(17) -0.0068(15) 
O3 0.041(2) 0.022(2) 0.027(2) 0.002(2) -0.0100(17) 0.0033(17) 
O4 0.037(2) 0.025(2) 0.021(2) -0.0011(17) -0.005(2) 0.0041(16) 
O5 0.040(3) 0.099(5) 0.056(4) 0.021(3) -0.012(3) -0.016(3) 
N 0.022(2) 0.024(2) 0.038(3) -0.001(3) 0.000(2) -0.001(2) 
C1 0.018(3) 0.014(3) 0.027(3) -0.004(2) -0.001(2) 0.003(2) 
C2 0.046(4) 0.016(3) 0.025(3) 0.000(2) 0.008(3) -0.002(3) 
C3 0.024(3) 0.023(3) 0.025(3) 0.005(3) 0.011(3) -0.001(2) 
C4 0.078(7) 0.023(4) 0.38(2) -0.001(9) -0.014(12) 0.004(4) 
C5 0.046(4) 0.020(4) 0.42(2) 0.024(9) -0.037(11) -0.008(4) 
 
_geom_special_details 
; 
 All esds (except the esd in the dihedral angle between two l.s. planes) 
 are estimated using the full covariance matrix.  The cell esds are taken 
 into account individually in the estimation of esds in distances, angles 
 and torsion angles; correlations between esds in cell parameters are only 
 used when they are defined by crystal symmetry.  An approximate (isotropic) 
 treatment of cell esds is used for estimating esds involving l.s. planes. 
; 
 
loop_ 
 _geom_bond_atom_site_label_1 
 _geom_bond_atom_site_label_2 
 _geom_bond_distance 
 _geom_bond_site_symmetry_2 
 _geom_bond_publ_flag 
Cu O4 1.936(4) . ? 
Cu O2 1.961(3) 3_465 ? 
Cu O1 1.973(4) . ? 
Cu N 2.028(4) . ? 
Cu O3 2.251(4) 8_454 ? 
O1 C1 1.266(6) . ? 
O2 C1 1.252(5) . ? 
O2 Cu 1.961(3) 4_665 ? 
O3 C3 1.257(6) . ? 
O3 Cu 2.251(4) 8_455 ? 
O4 C3 1.255(6) . ? 
N C5 1.219(7) . ? 
N C4 1.235(9) . ? 
C1 C2 1.493(7) . ? 
C2 C3 1.512(7) . ? 
C4 C5 1.389(11) 2_565 ? 
C4 C5 2.009(10) . ? 
C5 C4 1.389(11) 2_565 ? 
 
loop_ 
 _geom_angle_atom_site_label_1 
 _geom_angle_atom_site_label_2 
 _geom_angle_atom_site_label_3 
 _geom_angle 
 _geom_angle_site_symmetry_1 
 _geom_angle_site_symmetry_3 
 _geom_angle_publ_flag 
O4 Cu O2 171.34(14) . 3_465 ? 
O4 Cu O1 91.97(14) . . ? 
O2 Cu O1 87.33(14) 3_465 . ? 
O4 Cu N 87.76(17) . . ? 
O2 Cu N 92.25(16) 3_465 . ? 
O1 Cu N 175.46(17) . . ? 
O4 Cu O3 88.74(14) . 8_454 ? 
O2 Cu O3 99.88(13) 3_465 8_454 ? 
O1 Cu O3 90.17(13) . 8_454 ? 
N Cu O3 94.35(15) . 8_454 ? 
C1 O1 Cu 123.5(3) . . ? 
C1 O2 Cu 118.6(4) . 4_665 ? 
C3 O3 Cu 128.1(3) . 8_455 ? 
C3 O4 Cu 125.8(3) . . ? 
C5 N C4 109.9(6) . . ? 
C5 N Cu 123.8(5) . . ? 
C4 N Cu 126.2(4) . . ? 
O2 C1 O1 121.1(5) . . ? 
O2 C1 C2 118.2(5) . . ? 
O1 C1 C2 120.7(4) . . ? 
C1 C2 C3 114.6(5) . . ? 
O4 C3 O3 122.2(4) . . ? 
O4 C3 C2 119.5(5) . . ? 
O3 C3 C2 118.2(5) . . ? 
N C4 C5 124.9(6) . 2_565 ? 
N C4 C5 34.8(3) . . ? 
C5 C4 C5 90.2(5) 2_565 . ? 
N C5 C4 124.1(8) . 2_565 ? 
N C5 C4 35.3(4) . . ? 
C4 C5 C4 89.1(5) 2_565 . ? 
 
loop_ 
 _geom_hbond_atom_site_label_D 
 _geom_hbond_atom_site_label_H 
 _geom_hbond_atom_site_label_A 
 _geom_hbond_distance_DH 
 _geom_hbond_distance_HA 
 _geom_hbond_distance_DA 
 _geom_hbond_angle_DHA 
 _geom_hbond_site_symmetry_A 
O5 HO5A O2  0.80(8) 2.34(8) 3.071(8) 151(9) 5_545 
 
_diffrn_measured_fraction_theta_max    0.999 
_diffrn_reflns_theta_full              27.48 
_diffrn_measured_fraction_theta_full   0.999 
_refine_diff_density_max    0.515 
_refine_diff_density_min   -0.632 
_refine_diff_density_rms    0.123 
